# Supplementary material
Source: PubMed Central journal article supplement (PMC4832078)
Supplement: NIHMS774981-supplement-Supplementary_File.pdf [file NIHMS774981-supplement-Supplementary_File.pdf]

# Supporting Information for: The Not Face: A grammaticalization of facial expressions

## Sentences used in this study

Tables S1–S3 the seventy-eight (78) sentences and four (4) questions used in Experiment 2. Experiment 3 only includes data for the seventy-eight sentences given in Tables S1–S2 .

Table S1: First few sentences used in Experiments 2 & 3.

| Clause                                                 | Polarity | Construction type |
|--------------------------------------------------------|----------|-------------------|
| Brad is cooking fish on the grill                      | Positive | Assertion         |
| Brad is not cooking fish on the grill                  | Negative | Assertion         |
| Can John eat the last piece of cake?                   | Positive | Yes/no-question   |
| Is Mary starting the grill?                            | Positive | Yes/no-question   |
| Is Sarah having a party next weekend?                  | Positive | Yes/no-question   |
| Is the fork in the kitchen?                            | Positive | Yes/no-question   |
| John cannot finish eating the last piece of cake       | Negative | Assertion         |
| John is bringing chocolate cake with nuts              | Positive | Assertion         |
| John is bringing the chocolate cake with nuts          | Positive | Assertion         |
| John is not bringing the chocolate cake with nuts      | Negative | Assertion         |
| Mary is not starting the grill                         | Negative | Assertion         |
| Mary is starting the grill                             | Positive | Assertion         |
| Sarah had a party yesterday                            | Positive | Assertion         |
| Sarah is going to have a party next weekend            | Positive | Assertion         |
| Sarah is going to have a party tomorrow                | Positive | Assertion         |
| The fork is in the kitchen                             | Positive | Assertion         |
| The fork is not in the kitchen                         | Negative | Assertion         |
| When is Sarah going to have a party?                   | Positive | Wh-question       |
| Where is the fork?                                     | Positive | Wh-question       |
| Who can finish the last piece of cake?                 | Positive | Wh-question       |
| Who can't eat the last piece of cake?                  | Negative | Wh-question       |
| Who is bringing the chocolate cake with nuts?          | Positive | Wh-question       |
| Who is cooking the fish on the grill?                  | Positive | Wh-question       |
| Who is starting the grill?                             | Positive | Wh-question       |
| Why John is not bringing the chocolate cake with nuts? | Negative | Wh-question       |
| Why Mary has not started the grill?                    | Negative | Wh-question       |

The first column shows the sentence signed / uttered by participants. The second column indicates the polarity of the sentence (positive or negative). The last column indicates the type of sentence (yes/no questions, wh-questions, and assertions).

Table S2: Additional sentences used in Experiments 2 & 3.

| Clause                                                                                 | Polarity and construction type of each of its parts |
|----------------------------------------------------------------------------------------|-----------------------------------------------------|
| If Brad cooks the fish on the grill, do you mind eating it?                            | Positive Hypothetical + Positive Yes/no-question    |
| If Brad cooks the fish on the grill, I will bring the salad                            | Positive Hypothetical + Positive Assertion          |
| If Brad cooks the fish on the grill, I won't eat it                                    | Positive Hypothetical + Negative Assertion          |
| If Brad cooks the fish on the grill, I'd prefer to order pizza                         | Positive Hypothetical + Positive Assertion          |
| If Brad cooks the fish on the grill, it will explode                                   | Positive Hypothetical + Positive Assertion          |
| If Brad cooks the fish on the grill, we will need a fire extinguisher                  | Positive Hypothetical + Positive Assertion          |
| If Brad doesn't proceed to cook the fish on the grill, I don't mind doing it           | Negative Hypothetical + Negative Assertion          |
| If Brad proceeds to cook the fish on the grill, I can bring the chicken                | Positive Hypothetical + Positive Assertion          |
| If Brad proceeds to cook the fish on the grill, who is going to clean?                 | Positive Hypothetical + Positive Wh-question        |
| If I bake the bread, Brad will cook the fish on the grill                              | Positive Hypothetical + Positive Assertion          |
| If I don't cook the fish on the grill, Brad would do it                                | Negative Hypothetical + Positive Assertion          |
| If I knew that Brad was going to cook the fish on the grill, I'd prefer ordering pizza | Positive Hypothetical + Positive Assertion          |
| If John brings chocolate cake with nuts, I will bring the fork                         | Positive Hypothetical + Positive Assertion          |
| If John brings the chocolate cake with nuts, I can't eat it                            | Positive Hypothetical + Negative Assertion          |
| If John can't run out eating that cake, who can do it?                                 | Negative Hypothetical + Positive Wh-question        |
| If John can't eat up all the cake, I will eat it                                       | Negative Hypothetical + Positive Assertion          |
| If John doesn't bring the chocolate cake, can you bring it?                            | Negative Hypothetical + Positive Yes/no-question    |
| If John doesn't run out that cake, who can do it?                                      | Negative Hypothetical + Positive Wh-question        |
| If John eat all the cake, then he can't eat the pie                                    | Positive Hypothetical + Negative Assertion          |
| If John eat up all the cake, it would be a silly surprise                              | Positive Hypothetical + Positive Assertion          |
| If John is bringing the chocolate cake with nuts, can I have a piece of it?            | Positive Hypothetical + Positive Yes/no-question    |
| If John is bringing the chocolate cake with nuts, who is bringing the forks?           | Positive Hypothetical + Positive Wh-question        |
| If John is not going to bring the chocolate cake with nuts, I will bring it            | Negative Hypothetical + Positive Assertion          |
| If John is not going to bring the chocolate cake with nuts, who is going to bring it?  | Negative Hypothetical + Positive Wh-question        |
| If John runs out that cake, I won't be surprised                                       | Positive Hypothetical + Negative Assertion          |
| If Mary does not start the grill, I can't cook the fish                                | Negative Hypothetical + Negative Assertion          |
| If Mary doesn't start the grill, I will start it                                       | Negative Hypothetical + Positive Assertion          |
| If Mary doesn't start the grill, can you start it?                                     | Negative Hypothetical + Positive Yes/no-question    |
| If Mary knew about starting the grill, why didn't she started it?                      | Positive Hypothetical + Negative Wh-question        |
| If Mary knew that I start cooking the fish, why didn't she start grilling it?          | Positive Hypothetical + Negative Wh-question        |
| If Mary knew that it was going to rain, why didn't she started the grill?              | Positive Hypothetical + Negative Wh-question        |
| If Mary proceeds to start the grill, do you mind cooking the fish?                     | Positive Hypothetical + Positive Yes/no-question    |
| If Mary proceeds to start the grill, I'll proceed to cook the fish                     | Positive Hypothetical + Positive Assertion          |
| If Mary starts the grill, who is going to cook the fish?                               | Positive Hypothetical + Positive Wh-question        |
| If Sarah doesn't have a party tomorrow, do you want to come to her house?              | Negative Hypothetical + Positive Yes/no-question    |
| If Sarah doesn't have a party tomorrow, they can gather at her house                   | Negative Hypothetical + Positive Assertion          |
| If Sarah has a party tomorrow, do you mind giving me a ride?                           | Positive Hypothetical + Positive Yes/no-question    |
| If Sarah has a party tomorrow, I can't go                                              | Positive Hypothetical + Negative Assertion          |
| If Sarah has a party tomorrow, I will bring cake                                       | Positive Hypothetical + Positive Assertion          |
| If Sarah has a party tomorrow, who is going to bring the food?                         | Positive Hypothetical + Positive Wh-question        |
| If the fork is in the kitchen, I won't get it                                          | Positive Hypothetical + Negative Assertion          |
| If the fork is in the kitchen, is in the drawer?                                       | Positive Hypothetical + Positive Yes/no-question    |
| If the fork is in the kitchen, where was it specifically?                              | Positive Hypothetical + Positive Wh-question        |
| If the fork is in the kitchen, why I can't find it?                                    | Positive Hypothetical + Negative Wh-question        |
| If the fork is not in the kitchen, can you search for it?                              | Negative Hypothetical + Positive Yes/no-question    |
| If the fork is not in the kitchen, I don't have it                                     | Negative Hypothetical + Negative Assertion          |
| If the fork is not in the kitchen, I don't have it                                     | Negative Hypothetical + Negative Assertion          |
| If the fork is not in the kitchen, I will get it                                       | Negative Hypothetical + Positive Assertion          |
| If the fork was left in the kitchen, I will get it                                     | Positive Hypothetical + Positive Assertion          |
| If there is still cake left, John can eat it all up                                    | Positive Hypothetical + Positive Assertion          |
| If you are not going to do anything tomorrow, Sara is going to have a party            | Negative Hypothetical + Positive Assertion          |

The first column shows the sentence uttered/signed by subjects. The second column indicates the polarity of the Hypothetical conditional clause and the polarity of the dependent clause *i.e.*, Yes/no questions, Wh-questions, Wh-questions postposed and Assertions.

Table S3: Questions used in Experiment 2.

|                                                                                                                                                 |
|-------------------------------------------------------------------------------------------------------------------------------------------------|
| 1. A study shows that tuition should increase 30% for in-state students. What do you think?                                                     |
| 2. Some professors think the University should take a stand on the death penalty, gun control and abortion. Do you think that's a good idea?    |
| 3. A group of football fans propose to eliminate exams on Fridays before a home game. Do you agree?                                             |
| 4. Some students think that undergraduates that wish to talk to a professor during office hours should pay a \$1 fee. What's your take on that? |

## **Supporting Information: Video Legend**

This video shows three examples of the “not face” in speech and signing. Two of these examples are in speech (the same sentence in English and Spanish). The other example is as a non-manual marker of negation in American Sign Language.
